# Supplementary material for: Improved side-chain torsion potentials for the Amber ff99SB protein force field
Source: PubMed Central journal article supplement (PMC2970904; doi:10.1002/prot.22711), 2010-03-09
Supplement: prot0078-1950-SD1.pdf [file prot0078-1950-SD1.pdf]

# Improved side-chain torsion potentials for the Amber ff99SB protein force field

## Supporting Information

Kresten Lindorff-Larsen, Stefano Piana, Kim Palmo, Paul Maragakis, John L. Klepeis,  
Ron O. Dror, and David E. Shaw

*Torsion energy profiles for Ile, Leu, Asp and Asn.* Four files, one for each amino acid, (e\_torsion\_ile.txt, e\_torsion\_leu.txt, e\_torsion\_asp.txt and e\_torsion\_asn.txt) are provided. In these files, energies (in units of kcal mol<sup>-1</sup>) are reported as a function of the  $\chi_1$  and  $\chi_2$  angles. These energies were calculated *ab initio* at the LMP2 level of theory, as well as using the Amber ff99SB force field and the force field containing the improved torsion potentials derived in this study (amber99SB-ILDN). Differences between *ab initio* and force field energies are also reported.

*NMR <sup>3</sup>J scalar couplings used for the validation of the amber99SB-ILDN torsion potentials.* Four files (gb3\_3j.txt, ubq\_3j.txt, bpti\_3j.txt, hewl\_3j.txt) are provided containing the side-chain <sup>3</sup>J scalar couplings used for the validation of the amber99SB-ILDN torsion potentials. Each file contains the experimentally-measured couplings for one of the four proteins used for the validation (GB3, Ubiquitin, BPTI and hen egg white lysozyme) and is reported together with the values calculated in MD simulations using the amber99SB and amber99SB-ILDN force fields.

*Rotamer distributions in the PDB and MD simulations of helical peptides.* The file `rotamers.txt` contain the rotamer distribution (for the  $\chi_1$  dihedral) observed for residues in helices in the PDB as well as in simulations of the poly-alanine-based peptides described in this manuscript.

```

#
# CAPPED ISOLEUCINE PEPTIDE
# Calculated energies (kcal/mol) as a function of chi1 and chi2 angles
#
# NOTE: chi1 is defined as N-CA-CB-CG2
#
# Eqm is the ab initio LMP2 energy
# Emm is the Amber99SB energy
# Emod is the modified Amber99SB energy
#
# chi1  chi2  Eqm  Emm  Eqm-Emm  Emod  Eqm-Emod
67.0  -60.0  4.483  3.636  0.847  4.578  -0.096
81.0  -60.0  4.588  3.340  1.247  4.454  0.134
97.0  -60.0  5.033  3.667  1.366  4.743  0.290
114.0 -60.0  5.370  4.369  1.001  5.134  0.236
131.0 -60.0  5.086  4.671  0.415  4.940  0.146
147.0 -60.0  3.394  3.375  0.020  3.145  0.249
162.0 -60.0  1.262  1.545  -0.283  0.954  0.308
176.0 -60.0  0.475  1.141  -0.667  0.388  0.087
-170.0 -60.0  1.756  2.563  -0.807  1.854  -0.099
-156.0 -60.0  3.736  4.637  -0.901  4.172  -0.435
-142.0 -60.0  6.137  6.656  -0.519  6.576  -0.439
-127.0 -60.0  7.242  7.258  -0.016  7.652  -0.410
-111.0 -60.0  7.236  6.703  0.533  7.541  -0.305
-95.0  -60.0  6.414  5.071  1.343  6.166  0.248
-80.0  -60.0  4.660  3.121  1.540  4.228  0.432
-67.0  -60.0  3.168  1.517  1.652  2.459  0.709
-54.0  -60.0  2.443  1.363  1.080  2.018  0.426
-39.0  -60.0  3.818  3.337  0.480  3.592  0.226
-24.0  -60.0  6.750  6.918  -0.168  6.808  -0.059
-8.0   -60.0  9.516  10.083  -0.567  9.742  -0.226
9.0   -60.0  10.016  10.317  -0.301  9.984  0.033
26.0  -60.0  8.056  8.608  -0.553  8.541  -0.486
41.0  -60.0  5.922  6.550  -0.628  6.858  -0.936
52.0  -60.0  5.314  5.149  0.165  5.752  -0.438
71.0  60.0  1.170  0.106  1.065  1.114  0.056
84.0  60.0  2.726  1.672  1.054  2.798  -0.073
100.0 60.0  4.233  3.463  0.770  4.503  -0.270
116.0 60.0  5.364  4.714  0.650  5.428  -0.064
134.0 60.0  5.415  5.812  -0.397  5.985  -0.570
150.0 60.0  4.301  5.682  -1.381  5.369  -1.067
164.0 60.0  3.110  4.966  -1.856  4.339  -1.230
178.0 60.0  3.223  4.547  -1.325  3.787  -0.564
-169.0 60.0  3.621  4.900  -1.279  4.203  -0.581
-154.0 60.0  4.744  5.412  -0.668  4.995  -0.251
-140.0 60.0  5.851  5.740  0.111  5.722  0.129
-124.0 60.0  5.823  5.458  0.365  5.944  -0.121
-108.0 60.0  5.102  3.416  1.686  4.318  0.783
-92.0  60.0  4.077  1.766  2.311  2.882  1.195
-78.0  60.0  4.365  1.228  3.137  2.320  2.045
-65.0  60.0  4.508  3.469  1.039  4.373  0.135

```

|        |       |       |        |        |       |        |
|--------|-------|-------|--------|--------|-------|--------|
| -52.0  | 60.0  | 5.130 | 5.211  | -0.081 | 5.814 | -0.684 |
| -39.0  | 60.0  | 5.786 | 6.846  | -1.060 | 7.100 | -1.315 |
| -24.0  | 60.0  | 6.764 | 8.259  | -1.495 | 8.150 | -1.385 |
| -8.0   | 60.0  | 8.482 | 9.226  | -0.744 | 8.885 | -0.403 |
| 11.0   | 60.0  | 8.157 | 9.071  | -0.913 | 8.756 | -0.599 |
| 28.0   | 60.0  | 5.435 | 5.695  | -0.260 | 5.673 | -0.238 |
| 43.0   | 60.0  | 2.808 | 1.859  | 0.949  | 2.221 | 0.587  |
| 55.0   | 60.0  | 1.252 | -0.005 | 1.257  | 0.674 | 0.577  |
| 70.0   | 178.0 | 1.117 | 0.619  | 0.498  | 1.612 | -0.496 |
| 84.0   | 178.0 | 2.167 | 1.660  | 0.507  | 2.786 | -0.619 |
| 99.0   | 178.0 | 3.957 | 3.317  | 0.640  | 4.370 | -0.413 |
| 115.0  | 178.0 | 5.021 | 4.584  | 0.437  | 5.324 | -0.303 |
| 133.0  | 178.0 | 4.786 | 4.519  | 0.267  | 4.724 | 0.063  |
| 149.0  | 178.0 | 3.110 | 3.142  | -0.032 | 2.856 | 0.253  |
| 164.0  | 178.0 | 1.302 | 1.631  | -0.329 | 1.005 | 0.297  |
| 178.0  | 178.0 | 0.000 | 0.864  | -0.864 | 0.104 | -0.104 |
| -168.0 | 178.0 | 0.557 | 1.208  | -0.651 | 0.523 | 0.034  |
| -154.0 | 178.0 | 1.791 | 2.274  | -0.483 | 1.856 | -0.065 |
| -140.0 | 178.0 | 3.446 | 3.483  | -0.037 | 3.465 | -0.019 |
| -125.0 | 178.0 | 4.362 | 4.141  | 0.221  | 4.597 | -0.235 |
| -108.0 | 178.0 | 4.198 | 3.466  | 0.732  | 4.368 | -0.170 |
| -93.0  | 178.0 | 2.970 | 1.808  | 1.162  | 2.918 | 0.052  |
| -78.0  | 178.0 | 1.669 | 0.363  | 1.306  | 1.455 | 0.214  |
| -65.0  | 178.0 | 1.211 | 0.028  | 1.183  | 0.932 | 0.278  |
| -51.0  | 178.0 | 1.839 | 1.139  | 0.700  | 1.716 | 0.123  |
| -39.0  | 178.0 | 3.179 | 2.894  | 0.285  | 3.149 | 0.031  |
| -24.0  | 178.0 | 4.776 | 5.197  | -0.421 | 5.088 | -0.311 |
| -7.0   | 178.0 | 6.089 | 6.854  | -0.765 | 6.506 | -0.417 |
| 11.0   | 178.0 | 6.068 | 6.864  | -0.796 | 6.550 | -0.482 |
| 28.0   | 178.0 | 4.331 | 5.066  | -0.736 | 5.044 | -0.713 |
| 43.0   | 178.0 | 2.342 | 2.669  | -0.327 | 3.032 | -0.689 |
| 55.0   | 178.0 | 1.275 | 1.135  | 0.140  | 1.815 | -0.540 |

```

#
# CAPPED LEUCINE PEPTIDE
# Calculated energies (kcal/mol) as a function of chi1 and chi2 angles
# NOTE: chi1 is defined as C-CA-CB-CG
# Eqm is the ab initio LMP2 energy
# Emm is the Amber99SB energy
# Emod is the modified Amber99SB energy

```

```

#
# chi1  chi2  Eqm    Emm    Eqm-Emm  Emod  Eqm-Emod
  76.0  -60.0  3.004  3.151  -0.147  3.459  -0.455
   91.0  -60.0  3.320  2.848   0.471  3.148   0.172
  104.0  -60.0  3.687  2.884   0.804  3.096   0.591
  118.0  -60.0  3.770  3.326   0.444  3.336   0.433
  133.0  -60.0  3.214  3.221  -0.007  2.905   0.309
  150.0  -60.0  1.801  2.137  -0.337  1.408   0.393
  165.0  -60.0  0.226  0.855  -0.630  -0.158   0.384
  180.0  -60.0  0.000  1.050  -1.050  -0.070   0.070
-165.0  -60.0  1.413  3.087  -1.673  2.074  -0.660
-151.0  -60.0  3.603  5.964  -2.360  5.212  -1.608
-135.0  -60.0  5.751  8.537  -2.786  8.173  -2.422
-121.0  -60.0  6.765  9.488  -2.723  9.441  -2.676
-106.0  -60.0  6.937  8.779  -1.842  8.970  -2.033
  -91.0  -60.0  5.683  7.190  -1.507  7.490  -1.806
  -77.0  -60.0  4.496  5.140  -0.643  5.450  -0.953
  -63.0  -60.0  2.889  3.064  -0.175  3.346  -0.457
  -51.0  -60.0  2.456  1.946   0.510  2.205   0.251
  -40.0  -60.0  3.508  3.048   0.460  3.300   0.208
  -28.0  -60.0  6.037  5.966   0.071  6.229  -0.191
  -11.0  -60.0  8.316  8.617  -0.301  8.903  -0.587
   10.0  -60.0  8.361  8.628  -0.267  8.915  -0.554
   29.0  -60.0  6.133  6.874  -0.742  7.136  -1.003
   45.0  -60.0  3.845  5.063  -1.218  5.316  -1.471
   59.0  -60.0  3.489  3.256   0.232  3.529  -0.040
   75.0   60.0  2.801  2.509   0.292  2.816  -0.015
   90.0   60.0  3.861  2.817   1.044  3.119   0.742
  104.0   60.0  4.130  3.206   0.924  3.418   0.711
  119.0   60.0  4.200  3.604   0.596  3.595   0.605
  136.0   60.0  3.769  4.345  -0.576  3.956  -0.187
  152.0   60.0  2.940  4.236  -1.296  3.462  -0.522
  166.0   60.0  2.369  4.034  -1.665  3.007  -0.638
  180.0   60.0  2.798  4.425  -1.627  3.305  -0.507
-166.0   60.0  4.119  5.973  -1.853  4.946  -0.827
-152.0   60.0  5.607  7.794  -2.188  7.020  -1.413
-137.0   60.0  7.209  9.083  -1.874  8.669  -1.461
-121.0   60.0  7.578  9.314  -1.736  9.267  -1.689
-107.0   60.0  7.130  8.153  -1.023  8.332  -1.202
  -94.0   60.0  6.487  6.495  -0.008  6.783  -0.296
  -82.0   60.0  6.037  5.619   0.418  5.933   0.104
  -69.0   60.0  5.650  5.279   0.371  5.575   0.076
  -53.0   60.0  5.768  5.672   0.096  5.933  -0.165
  -37.0   60.0  6.026  5.957   0.069  6.211  -0.185
  -23.0   60.0  7.252  7.292  -0.040  7.561  -0.310
   -7.0   60.0  9.041  8.787   0.254  9.077  -0.036
   13.0   60.0  8.866  8.577   0.289  8.861   0.005

```

|        |       |       |        |        |       |        |
|--------|-------|-------|--------|--------|-------|--------|
| 32.0   | 60.0  | 6.450 | 6.279  | 0.171  | 6.537 | -0.087 |
| 46.0   | 60.0  | 3.699 | 3.859  | -0.161 | 4.113 | -0.414 |
| 58.0   | 60.0  | 3.056 | 2.073  | 0.983  | 2.343 | 0.713  |
| 72.0   | 178.0 | 0.759 | 0.670  | 0.089  | 0.972 | -0.213 |
| 87.0   | 178.0 | 2.402 | 2.104  | 0.297  | 2.414 | -0.012 |
| 102.0  | 178.0 | 3.674 | 3.475  | 0.199  | 3.707 | -0.033 |
| 119.0  | 178.0 | 4.208 | 4.120  | 0.088  | 4.112 | 0.096  |
| 136.0  | 178.0 | 3.858 | 4.465  | -0.607 | 4.076 | -0.218 |
| 152.0  | 178.0 | 3.060 | 4.473  | -1.413 | 3.699 | -0.639 |
| 166.0  | 178.0 | 2.728 | 4.624  | -1.896 | 3.597 | -0.870 |
| 180.0  | 178.0 | 3.352 | 5.366  | -2.014 | 4.246 | -0.894 |
| -167.0 | 178.0 | 4.516 | 6.585  | -2.069 | 5.545 | -1.029 |
| -154.0 | 178.0 | 5.762 | 7.735  | -1.973 | 6.917 | -1.155 |
| -139.0 | 178.0 | 6.700 | 8.513  | -1.814 | 8.050 | -1.350 |
| -122.0 | 178.0 | 6.862 | 8.123  | -1.261 | 8.056 | -1.194 |
| -108.0 | 178.0 | 5.574 | 5.941  | -0.367 | 6.108 | -0.534 |
| -95.0  | 178.0 | 4.700 | 4.091  | 0.610  | 4.373 | 0.327  |
| -83.0  | 178.0 | 4.458 | 3.790  | 0.667  | 4.103 | 0.354  |
| -70.0  | 178.0 | 4.816 | 4.647  | 0.169  | 4.945 | -0.129 |
| -54.0  | 178.0 | 5.465 | 5.778  | -0.312 | 6.040 | -0.575 |
| -36.0  | 178.0 | 6.160 | 6.749  | -0.589 | 7.004 | -0.843 |
| -19.0  | 178.0 | 6.940 | 7.328  | -0.388 | 7.604 | -0.664 |
| -2.0   | 178.0 | 7.828 | 7.669  | 0.159  | 7.961 | -0.133 |
| 17.0   | 178.0 | 6.600 | 6.683  | -0.083 | 6.961 | -0.361 |
| 34.0   | 178.0 | 3.966 | 4.038  | -0.071 | 4.293 | -0.327 |
| 47.0   | 178.0 | 1.518 | 1.380  | 0.138  | 1.635 | -0.117 |
| 58.0   | 178.0 | 0.491 | -0.001 | 0.492  | 0.269 | 0.222  |

```

#
# CAPPED ASPARTATE PEPTIDE
# Calculated energies (kcal/mol) as a function of chi1 and chi2 angles
#
# NOTE: chi1 is defined as N-CA-CB-CG
#
# Eqm is the ab initio LMP2 energy
# Emm is the Amber99SB energy
# Emod is the modified Amber99SB energy
#
# chi1  chi2  Eqm    Emm    Eqm-Emm  Emod  Eqm-Emod
-150.0 -120.0  8.534  5.738  2.796   6.807  1.727
-120.0 -120.0 14.990 11.938  3.052  12.484  2.506
 -90.0 -120.0 12.540 12.056  0.485  13.061 -0.521
 -60.0 -120.0  8.339 10.295 -1.956   8.451 -0.112
 -30.0 -120.0  7.710 11.367 -3.657   7.471  0.240
  -0.0 -120.0  9.559 13.003 -3.444   8.792  0.767
  30.0 -120.0 12.704 13.632 -0.929   9.736  2.968
  60.0 -120.0 14.472 13.698  0.775  11.853  2.619
  90.0 -120.0 12.132 12.795 -0.663  13.800 -1.668
 120.0 -120.0 10.540 10.966 -0.426  11.511 -0.971
 150.0 -120.0  5.238  5.076  0.162   6.145 -0.907
 178.0 -120.0  1.769  1.052  0.717   1.667  0.102
-150.0  -30.0  1.230  1.595 -0.365   1.830 -0.600
-120.0  -30.0  7.969  8.218 -0.249   7.930  0.039
 -90.0  -30.0 11.940 11.691  0.249  11.863  0.077
 -60.0  -30.0  9.877 13.356 -3.479  10.678 -0.801
 -30.0  -30.0 11.209 15.879 -4.670  11.149  0.061
   0.0  -30.0 12.290 17.035 -4.744  11.990  0.300
  30.0  -30.0  7.481 12.473 -4.992   7.743 -0.262
  60.0  -30.0  7.997 10.470 -2.473   7.793  0.204
  90.0  -30.0 15.868 15.334  0.534  15.506  0.362
 120.0  -30.0 15.573 17.985 -2.411  17.697 -2.124
 150.0  -30.0  7.671 12.423 -4.752  12.658 -4.987
 178.0  -30.0  3.264  4.804 -1.540   4.586 -1.321
-150.0  178.0  1.187  1.504 -0.318   0.836  0.350
-120.0  178.0 10.348 10.315  0.033   9.124  1.224
 -90.0  178.0 12.686 13.936 -1.250  13.205 -0.519
 -60.0  178.0  9.659 14.455 -4.796  10.874 -1.215
 -30.0  178.0 11.247 16.762 -5.515  11.128  0.119
   0.0  178.0 10.253 16.763 -6.511  10.816 -0.563
  30.0  178.0  7.160 13.036 -5.876   7.402 -0.242
  60.0  178.0 10.678 13.088 -2.410   9.507  1.171
  90.0  178.0 16.914 17.911 -0.997  17.179 -0.265
 120.0  178.0 11.715 18.483 -6.769  17.292 -5.578
 150.0  178.0  6.888 10.371 -3.483   9.703 -2.815
 178.0  178.0  0.799  1.965 -1.166   0.843 -0.044
-150.0   0.0  1.392  1.717 -0.325   1.043  0.348
-120.0   0.0 10.886 10.740  0.146   9.543  1.343
 -90.0   0.0 12.771 14.087 -1.315  13.350 -0.579
 -60.0   0.0  9.651 14.472 -4.821  10.886 -1.234
 -30.0   0.0 11.225 16.756 -5.531  11.117  0.108
   0.0   0.0 10.157 16.714 -6.557  10.760 -0.603
  30.0   0.0  7.284 12.999 -5.716   7.360 -0.077

```

|        |        |        |        |        |        |        |
|--------|--------|--------|--------|--------|--------|--------|
| 60.0   | 0.0    | 11.298 | 13.656 | -2.358 | 10.070 | 1.228  |
| 90.0   | 0.0    | 16.897 | 17.943 | -1.045 | 17.206 | -0.309 |
| 120.0  | 0.0    | 11.737 | 18.450 | -6.714 | 17.254 | -5.517 |
| 150.0  | 0.0    | 6.821  | 10.594 | -3.773 | 9.921  | -3.100 |
| 178.0  | 0.0    | 0.748  | 2.223  | -1.475 | 1.096  | -0.348 |
| -150.0 | -150.0 | 4.831  | 3.815  | 1.016  | 4.051  | 0.780  |
| -120.0 | -150.0 | 13.845 | 12.546 | 1.299  | 12.258 | 1.587  |
| -90.0  | -150.0 | 12.888 | 14.182 | -1.294 | 14.354 | -1.467 |
| -60.0  | -150.0 | 9.406  | 13.250 | -3.844 | 10.573 | -1.167 |
| -30.0  | -150.0 | 9.344  | 14.539 | -5.194 | 9.809  | -0.464 |
| 0.0    | -150.0 | 8.741  | 14.004 | -5.263 | 8.959  | -0.219 |
| 30.0   | -150.0 | 9.541  | 13.308 | -3.767 | 8.578  | 0.963  |
| 60.0   | -150.0 | 14.552 | 15.424 | -0.872 | 12.746 | 1.806  |
| 90.0   | -150.0 | 14.048 | 16.773 | -2.725 | 16.945 | -2.897 |
| 120.0  | -150.0 | 10.164 | 14.246 | -4.082 | 13.959 | -3.794 |
| 150.0  | -150.0 | 5.095  | 6.169  | -1.074 | 6.405  | -1.309 |
| 178.0  | -150.0 | 0.000  | -0.001 | 0.001  | -0.219 | 0.219  |
| -150.0 | -60.0  | 4.064  | 3.259  | 0.805  | 4.328  | -0.264 |
| -120.0 | -60.0  | 8.694  | 7.170  | 1.524  | 7.715  | 0.978  |
| -90.0  | -60.0  | 11.422 | 9.401  | 2.021  | 10.407 | 1.016  |
| -60.0  | -60.0  | 9.088  | 10.767 | -1.679 | 8.923  | 0.166  |
| -30.0  | -60.0  | 9.949  | 13.491 | -3.542 | 9.594  | 0.355  |
| 0.0    | -60.0  | 12.955 | 15.346 | -2.391 | 11.135 | 1.820  |
| 30.0   | -60.0  | 10.300 | 12.138 | -1.838 | 8.241  | 2.059  |
| 60.0   | -60.0  | 7.230  | 9.158  | -1.928 | 7.314  | -0.084 |
| 90.0   | -60.0  | 13.626 | 11.995 | 1.631  | 13.000 | 0.626  |
| 120.0  | -60.0  | 16.341 | 14.731 | 1.610  | 15.277 | 1.065  |
| 150.0  | -60.0  | 8.934  | 10.622 | -1.689 | 11.691 | -2.757 |
| 178.0  | -60.0  | 4.692  | 5.098  | -0.406 | 5.713  | -1.021 |
| -150.0 | -90.0  | 7.845  | 5.252  | 2.593  | 6.404  | 1.441  |
| -120.0 | -90.0  | 13.024 | 9.696  | 3.328  | 10.325 | 2.699  |
| -90.0  | -90.0  | 11.905 | 10.008 | 1.898  | 11.096 | 0.809  |
| -60.0  | -90.0  | 7.830  | 9.061  | -1.230 | 7.300  | 0.530  |
| -30.0  | -90.0  | 8.010  | 11.338 | -3.328 | 7.524  | 0.485  |
| -0.0   | -90.0  | 11.147 | 13.904 | -2.757 | 9.776  | 1.371  |
| 30.0   | -90.0  | 13.238 | 12.853 | 0.385  | 9.040  | 4.199  |
| 60.0   | -90.0  | 11.122 | 10.633 | 0.489  | 8.872  | 2.249  |
| 90.0   | -90.0  | 12.265 | 10.802 | 1.463  | 11.890 | 0.374  |
| 120.0  | -90.0  | 13.262 | 11.444 | 1.817  | 12.074 | 1.188  |
| 150.0  | -90.0  | 7.268  | 7.327  | -0.059 | 8.479  | -1.211 |
| 178.0  | -90.0  | 4.265  | 3.583  | 0.681  | 4.282  | -0.017 |



```

#
# CAPPED ASPARAGINE PEPTIDE
# Calculated energies (kcal/mol) as a function of chi1 and chi2 angles
#
# NOTE: chi1 is defined as C-CA-CB-CG
#       chi2 is defined as CA-CB-CG-ND
#
# Eqm is the ab initio LMP2 energy
# Emm is the Amber99SB energy
# Emod is the modified Amber99SB energy
#
# chi1  chi2  Eqm    Emm    Eqm-Emm  Emod  Eqm-Emod
# 85.0  -120.0  4.184  5.993  -1.809  4.361  -0.177
# 117.0 -120.0  8.839  11.583 -2.744  9.774  -0.936
# 151.0 -120.0  7.547  11.215 -3.668  8.786  -1.239
# 178.0 -120.0  4.440  8.660  -4.220  4.787  -0.347
# -155.0 -120.0  5.090  9.592  -4.502  6.904  -1.814
# -124.0 -120.0  6.658  11.317 -4.658  9.550  -2.892
# -95.0  -120.0  7.039  10.076 -3.037  8.318  -1.279
# -66.0  -120.0  6.330  9.263  -2.932  7.857  -1.526
# -34.0  -120.0  5.552  9.028  -3.475  7.566  -2.013
# -1.0   -120.0  5.637  8.367  -2.730  6.072  -0.435
# 31.0   -120.0  2.960  4.247  -1.287  2.713   0.247
# 55.0   -120.0  0.397  1.757  -1.360  0.438  -0.041
# 87.0   -30.0  5.509  11.512 -6.003  8.371  -2.862
# 119.0  -30.0  9.096  14.382 -5.286  11.102 -2.006
# 150.0  -30.0  4.034  10.434 -6.400  6.582  -2.547
# 179.0  -30.0  0.000  5.437  -5.437  0.073  -0.073
# -154.0 -30.0  3.653  8.744  -5.091  4.640  -0.987
# -127.0 -30.0  9.532  15.869 -6.337  12.629 -3.096
# -93.0  -30.0  7.606  15.235 -7.628  12.016 -4.410
# -64.0  -30.0  6.017  10.832 -4.815  7.962  -1.945
# -37.0  -30.0  5.146  8.064  -2.918  5.178  -0.032
# -7.0   -30.0  7.827  9.647  -1.821  5.929   1.898
# 27.0   -30.0  7.399  10.088 -2.689  6.956   0.443
# 58.0   -30.0  5.659  9.353  -3.693  6.532  -0.873
# 83.0   178.0  0.825  0.913  -0.088  0.317   0.508
# 115.0  178.0  5.674  7.087  -1.414  6.276  -0.603
# 151.0  178.0  6.851  10.052 -3.201  8.633  -1.781
# -179.0 178.0  6.185  10.523 -4.338  7.651  -1.466
# -152.0 178.0  8.556  12.737 -4.181  11.255 -2.699
# -123.0 178.0  10.551  13.625 -3.074  12.862 -2.312
# -92.0  178.0  6.874  9.863  -2.989  9.150  -2.276
# -68.0  178.0  6.480  7.950  -1.470  7.532  -1.052
# -41.0  178.0  10.568  12.465 -1.897  12.128 -1.560
# -4.0   178.0  9.355  13.277 -3.922  12.010 -2.655
# 32.0   178.0  5.150  7.265  -2.114  6.765  -1.615
# 59.0   178.0  0.611  1.320  -0.709  0.985  -0.374
# 88.0    0.0  6.647  13.077 -6.429  9.309  -2.662
# 118.0   0.0  5.686  13.048 -7.361  9.149  -3.463
# 151.0   0.0  1.152  5.756  -4.604  1.231  -0.079
# 180.0   0.0  0.930  6.559  -5.629  0.579   0.350
# -155.0  0.0  7.349  14.737 -7.388  9.953  -2.605
# -124.0  0.0  10.125  20.363 -10.238  16.501 -6.376

```

|        |        |        |        |        |        |        |
|--------|--------|--------|--------|--------|--------|--------|
| -91.0  | 0.0    | 9.346  | 16.818 | -7.472 | 13.012 | -3.666 |
| -65.0  | 0.0    | 2.554  | 7.207  | -4.654 | 3.715  | -1.162 |
| -40.0  | 0.0    | 5.769  | 8.802  | -3.033 | 5.349  | 0.420  |
| -9.0   | 0.0    | 9.715  | 13.842 | -4.126 | 9.549  | 0.166  |
| 31.0   | 0.0    | 8.815  | 14.864 | -6.049 | 11.234 | -2.419 |
| 59.0   | 0.0    | 5.526  | 12.540 | -7.014 | 9.100  | -3.574 |
| 82.0   | -150.0 | 2.362  | 4.019  | -1.656 | 3.326  | -0.964 |
| 117.0  | -150.0 | 7.722  | 10.415 | -2.694 | 9.506  | -1.785 |
| 151.0  | -150.0 | 7.925  | 11.469 | -3.544 | 9.940  | -2.015 |
| 179.0  | -150.0 | 5.890  | 10.337 | -4.447 | 7.356  | -1.466 |
| -154.0 | -150.0 | 7.178  | 11.630 | -4.451 | 9.909  | -2.731 |
| -123.0 | -150.0 | 8.594  | 12.103 | -3.509 | 11.232 | -2.637 |
| -94.0  | -150.0 | 6.912  | 9.867  | -2.954 | 9.020  | -2.108 |
| -69.0  | -150.0 | 7.821  | 10.062 | -2.241 | 9.525  | -1.704 |
| -37.0  | -150.0 | 8.108  | 11.703 | -3.595 | 11.201 | -3.093 |
| -2.0   | -150.0 | 6.876  | 10.477 | -3.601 | 9.085  | -2.209 |
| 32.0   | -150.0 | 3.581  | 5.004  | -1.423 | 4.395  | -0.815 |
| 57.0   | -150.0 | 0.038  | -0.002 | 0.040  | -0.432 | 0.470  |
| 85.0   | 120.0  | 1.753  | 2.295  | -0.542 | 0.664  | 1.090  |
| 113.0  | 120.0  | 3.616  | 5.519  | -1.903 | 3.689  | -0.073 |
| 148.0  | 120.0  | 3.669  | 7.083  | -3.414 | 4.827  | -1.158 |
| 179.0  | 120.0  | 4.323  | 8.652  | -4.329 | 4.771  | -0.448 |
| -151.0 | 120.0  | 6.230  | 11.625 | -5.396 | 9.196  | -2.967 |
| -120.0 | 120.0  | 7.552  | 12.346 | -4.795 | 10.557 | -3.005 |
| -90.0  | 120.0  | 5.066  | 8.806  | -3.741 | 7.109  | -2.043 |
| -64.0  | 120.0  | 2.909  | 5.789  | -2.880 | 4.402  | -1.493 |
| -38.0  | 120.0  | 7.734  | 9.411  | -1.677 | 8.025  | -0.291 |
| -7.0   | 120.0  | 11.033 | 13.089 | -2.056 | 10.853 | 0.179  |
| 29.0   | 120.0  | 6.263  | 9.433  | -3.170 | 7.844  | -1.581 |
| 58.0   | 120.0  | 2.353  | 3.738  | -1.384 | 2.401  | -0.048 |
| 87.0   | -60.0  | 5.159  | 7.316  | -2.158 | 5.412  | -0.254 |
| 117.0  | -60.0  | 7.929  | 11.586 | -3.658 | 9.532  | -1.603 |
| 150.0  | -60.0  | 6.835  | 9.895  | -3.060 | 7.280  | -0.445 |
| 179.0  | -60.0  | 2.465  | 6.504  | -4.039 | 2.378  | 0.088  |
| -154.0 | -60.0  | 2.273  | 6.499  | -4.226 | 3.632  | -1.359 |
| -126.0 | -60.0  | 6.357  | 9.804  | -3.447 | 7.799  | -1.442 |
| -92.0  | -60.0  | 6.959  | 10.841 | -3.882 | 8.873  | -1.914 |
| -63.0  | -60.0  | 3.923  | 7.954  | -4.031 | 6.330  | -2.407 |
| -36.0  | -60.0  | 5.770  | 7.392  | -1.621 | 5.725  | 0.045  |
| -4.0   | -60.0  | 6.871  | 7.162  | -0.291 | 4.639  | 2.231  |
| 29.0   | -60.0  | 4.627  | 4.582  | 0.046  | 2.747  | 1.881  |
| 56.0   | -60.0  | 4.028  | 4.407  | -0.379 | 2.837  | 1.191  |
| 84.0   | 90.0   | 2.266  | 2.327  | -0.061 | 1.139  | 1.128  |
| 113.0  | 90.0   | 3.502  | 4.572  | -1.070 | 3.172  | 0.330  |
| 149.0  | 90.0   | 3.475  | 6.054  | -2.579 | 4.173  | -0.697 |
| 178.0  | 90.0   | 3.353  | 6.749  | -3.396 | 3.306  | 0.047  |
| -152.0 | 90.0   | 6.289  | 10.642 | -4.353 | 8.581  | -2.291 |
| -119.0 | 90.0   | 5.553  | 10.433 | -4.881 | 9.067  | -3.515 |
| -90.0  | 90.0   | 3.676  | 6.040  | -2.364 | 4.773  | -1.097 |
| -65.0  | 90.0   | 3.935  | 5.063  | -1.128 | 4.097  | -0.162 |
| -36.0  | 90.0   | 6.463  | 8.182  | -1.718 | 7.191  | -0.728 |
| -4.0   | 90.0   | 10.174 | 11.333 | -1.160 | 9.487  | 0.687  |
| 29.0   | 90.0   | 6.059  | 8.244  | -2.186 | 7.086  | -1.027 |
| 56.0   | 90.0   | 2.261  | 3.717  | -1.456 | 2.823  | -0.562 |

|        |       |        |        |        |        |        |
|--------|-------|--------|--------|--------|--------|--------|
| 85.0   | 60.0  | 2.224  | 3.778  | -1.554 | 1.900  | 0.324  |
| 115.0  | 60.0  | 2.062  | 2.758  | -0.696 | 0.692  | 1.370  |
| 148.0  | 60.0  | 3.110  | 4.532  | -1.422 | 2.031  | 1.079  |
| 179.0  | 60.0  | 3.556  | 8.769  | -5.213 | 4.642  | -1.086 |
| -155.0 | 60.0  | 6.864  | 12.332 | -5.468 | 9.398  | -2.534 |
| -119.0 | 60.0  | 6.875  | 12.109 | -5.234 | 10.067 | -3.192 |
| -91.0  | 60.0  | 2.054  | 4.064  | -2.010 | 2.109  | -0.054 |
| -68.0  | 60.0  | 3.695  | 3.945  | -0.250 | 2.273  | 1.422  |
| -37.0  | 60.0  | 8.601  | 9.628  | -1.027 | 7.980  | 0.621  |
| -3.0   | 60.0  | 8.997  | 12.061 | -3.064 | 9.530  | -0.533 |
| 31.0   | 60.0  | 7.290  | 9.225  | -1.935 | 7.445  | -0.155 |
| 56.0   | 60.0  | 2.178  | 4.667  | -2.489 | 3.097  | -0.920 |
| 85.0   | 150.0 | 0.534  | 1.681  | -1.147 | 0.949  | -0.415 |
| 113.0  | 150.0 | 3.744  | 6.122  | -2.378 | 5.192  | -1.448 |
| 150.0  | 150.0 | 5.011  | 8.322  | -3.311 | 6.853  | -1.842 |
| -179.0 | 150.0 | 5.377  | 10.021 | -4.645 | 7.040  | -1.664 |
| -152.0 | 150.0 | 7.664  | 12.454 | -4.789 | 10.862 | -3.198 |
| -122.0 | 150.0 | 9.308  | 13.709 | -4.402 | 12.832 | -3.525 |
| -91.0  | 150.0 | 6.715  | 9.696  | -2.981 | 8.886  | -2.171 |
| -66.0  | 150.0 | 4.395  | 6.720  | -2.325 | 6.214  | -1.819 |
| -41.0  | 150.0 | 9.675  | 11.271 | -1.596 | 10.825 | -1.150 |
| -7.0   | 150.0 | 11.198 | 14.160 | -2.962 | 12.825 | -1.627 |
| 30.0   | 150.0 | 5.620  | 9.290  | -3.670 | 8.629  | -3.009 |
| 59.0   | 150.0 | 2.110  | 2.662  | -0.552 | 2.218  | -0.108 |
| 85.0   | -90.0 | 5.273  | 6.249  | -0.976 | 5.047  | 0.226  |
| 117.0  | -90.0 | 8.381  | 10.944 | -2.563 | 9.565  | -1.184 |
| 149.0  | -90.0 | 6.659  | 9.665  | -3.006 | 7.784  | -1.125 |
| 178.0  | -90.0 | 3.322  | 6.744  | -3.422 | 3.301  | 0.021  |
| -155.0 | -90.0 | 3.597  | 7.721  | -4.124 | 5.463  | -1.866 |
| -126.0 | -90.0 | 5.832  | 8.960  | -3.127 | 7.631  | -1.799 |
| -94.0  | -90.0 | 6.607  | 9.173  | -2.565 | 7.856  | -1.249 |
| -64.0  | -90.0 | 4.742  | 6.335  | -1.593 | 5.378  | -0.637 |
| -34.0  | -90.0 | 4.395  | 6.882  | -2.487 | 5.850  | -1.455 |
| -3.0   | -90.0 | 6.187  | 7.100  | -0.913 | 5.245  | 0.942  |
| 30.0   | -90.0 | 3.145  | 3.744  | -0.599 | 2.613  | 0.532  |
| 55.0   | -90.0 | 1.558  | 2.194  | -0.636 | 1.306  | 0.252  |
| 86.0   | 30.0  | 3.511  | 8.362  | -4.851 | 5.233  | -1.723 |
| 117.0  | 30.0  | 2.279  | 6.617  | -4.338 | 3.325  | -1.046 |
| 150.0  | 30.0  | 0.923  | 4.026  | -3.103 | 0.173  | 0.750  |
| 179.0  | 30.0  | 4.144  | 8.512  | -4.368 | 3.148  | 0.997  |
| -154.0 | 30.0  | 7.651  | 16.086 | -8.435 | 11.982 | -4.331 |
| -124.0 | 30.0  | 9.993  | 18.084 | -8.092 | 14.834 | -4.841 |
| -89.0  | 30.0  | 3.376  | 8.739  | -5.363 | 5.571  | -2.195 |
| -68.0  | 30.0  | 2.493  | 4.407  | -1.915 | 1.497  | 0.995  |
| -41.0  | 30.0  | 7.133  | 9.582  | -2.449 | 6.753  | 0.380  |
| -4.0   | 30.0  | 11.096 | 15.607 | -4.511 | 11.847 | -0.751 |
| 31.0   | 30.0  | 7.934  | 13.429 | -5.495 | 10.411 | -2.477 |
| 60.0   | 30.0  | 5.002  | 9.277  | -4.275 | 6.442  | -1.440 |

```

#
# Scalar coupling data for GB3
#
# HA-CA-CB-HB couplings
# Column 1: Residue number
# Column 2: Four atoms that define the dihedral, each labelled by atom name
# Column 3: Experimental scalar coupling
# Column 4: Calculated scalar coupling from ff99SB simulation
# Column 5: Calculated scalar coupling from ff99SB-ILDN simulation
#
3   HA_CA_CB_HB2           11.81 10.82 10.82
3   HA_CA_CB_HB3           1.95  3.42  3.43
8   HA_CA_CB_HB2           6.09  3.26  7.36
8   HA_CA_CB_HB3           7.07 10.59  6.62
22  HA_CA_CB_HB2           3.99  4.04  3.25
22  HA_CA_CB_HB3           2.13  8.91  5.06
30  HA_CA_CB_HB2          11.33 10.58 10.56
30  HA_CA_CB_HB3           0.75  2.68  2.67
35  HA_CA_CB_HB2           7.92  3.76  5.06
35  HA_CA_CB_HB3           7.15 10.49  9.05
37  HA_CA_CB_HB2          12.27  8.48 10.40
37  HA_CA_CB_HB3           1.94  4.73  3.18
40  HA_CA_CB_HB2           3.64  3.30  4.15
40  HA_CA_CB_HB3          10.18 10.57  9.16
43  HA_CA_CB_HB2          11.13 10.59 10.60
43  HA_CA_CB_HB3           1.78  2.75  2.75
45  HA_CA_CB_HB2           4.41  3.68  3.66
45  HA_CA_CB_HB3          11.18 10.80 10.80
46  HA_CA_CB_HB2           3.41  3.90  3.86
46  HA_CA_CB_HB3          11.81 10.74 10.70
47  HA_CA_CB_HB2           3.58  2.96  3.02
47  HA_CA_CB_HB3          11.10 10.45 10.35
#
#
# N/C'-CA-CB-CG couplings, for residues where CG is a methyl
# Column 1: Residue number
# Column 2: Residue-name and first & last atom for dihedral (e.g. VAL_CCG1
means C'-CA-CG-CG1 in a Valine)
# Column 3: Experimental scalar coupling
# Column 4: Calculated scalar coupling from ff99SB simulation
# Column 5: Calculated scalar coupling from ff99SB-ILDN simulation
#
6   VAL_CCG1               0.77  0.90  0.92
6   VAL_CCG2               3.68  3.74  3.75
6   VAL_NCG1               1.99  1.92  1.93
6   VAL_NCG2               0.53  0.92  0.92
7   ILE_CCG2               0.58  0.96  0.63
7   ILE_NCG2               1.97  1.61  1.97
11  THR_CCG2               2.11  2.65  2.63
11  THR_NCG2               0.90  0.79  0.78
16  THR_CCG2               1.78  1.43  1.41
16  THR_NCG2               0.21  0.29  0.27
17  THR_CCG2               2.80  3.02  3.00
17  THR_NCG2               0.56  0.67  0.67
18  THR_CCG2               1.69  1.67  1.67
18  THR_NCG2               0.00  0.10  0.08
21  VAL_CCG1               2.52  3.47  3.11

```

|    |          |      |      |      |
|----|----------|------|------|------|
| 21 | VAL_CCG2 | 1.09 | 1.02 | 1.14 |
| 21 | VAL_NCG1 | 0.69 | 0.84 | 0.81 |
| 21 | VAL_NCG2 | 1.08 | 0.48 | 0.68 |
| 25 | THR_CCG2 | 2.60 | 1.41 | 1.18 |
| 25 | THR_NCG2 | 1.75 | 1.21 | 1.19 |
| 39 | VAL_CCG1 | 0.86 | 1.63 | 1.35 |
| 39 | VAL_CCG2 | 3.27 | 2.93 | 3.28 |
| 39 | VAL_NCG1 | 1.86 | 1.58 | 1.73 |
| 39 | VAL_NCG2 | 0.58 | 0.85 | 0.87 |
| 42 | VAL_CCG1 | 1.27 | 2.43 | 2.75 |
| 42 | VAL_CCG2 | 3.04 | 1.98 | 1.76 |
| 42 | VAL_NCG1 | 1.73 | 1.15 | 1.07 |
| 42 | VAL_NCG2 | 0.74 | 0.74 | 0.67 |
| 44 | THR_CCG2 | 2.88 | 2.62 | 2.51 |
| 44 | THR_NCG2 | 0.47 | 0.59 | 0.59 |
| 49 | THR_CCG2 | 3.05 | 3.50 | 3.48 |
| 49 | THR_NCG2 | 0.77 | 0.68 | 0.70 |
| 51 | THR_CCG2 | 0.52 | 0.26 | 0.26 |
| 51 | THR_NCG2 | 1.61 | 1.60 | 1.60 |
| 53 | THR_CCG2 | 0.45 | 0.46 | 0.40 |
| 53 | THR_NCG2 | 1.57 | 1.44 | 1.47 |
| 54 | VAL_CCG1 | 0.70 | 0.80 | 0.91 |
| 54 | VAL_CCG2 | 1.01 | 1.68 | 0.89 |
| 54 | VAL_NCG1 | 0.83 | 0.82 | 0.41 |
| 54 | VAL_NCG2 | 1.85 | 1.67 | 1.85 |
| 55 | THR_CCG2 | 0.00 | 0.71 | 0.58 |
| 55 | THR_NCG2 | 1.51 | 1.32 | 1.40 |

```

#
# Scalar coupling data for Ubq
#
# HA-CA-CB-HB couplings
# Column 1: Residue number
# Column 2: Four atoms that define the dihedral, each labelled by residue
number and atom name
# Column 3: Experimental scalar coupling
# Column 4: Calculated scalar coupling from ff99SB simulation
# Column 5: Calculated scalar coupling from ff99SB-ILDN simulation
#
1  1_HA_1_CA_1_CB_1_1HB      4.30  4.08  4.19
3  3_HA_3_CA_3_CB_3_HB       4.70  2.84  3.03
4  4_HA_4_CA_4_CB_4_1HB     11.90 10.57 10.54
4  4_HA_4_CA_4_CB_4_2HB       3.60  3.99  4.09
5  5_HA_5_CA_5_CB_5_HB       9.60  9.42  8.94
6  6_HA_6_CA_6_CB_6_1HB       6.20  6.80  7.41
6  6_HA_6_CA_6_CB_6_2HB       7.00  6.62  6.00
8  8_HA_8_CA_8_CB_8_1HB       8.70  5.87  9.35
8  8_HA_8_CA_8_CB_8_2HB       4.10  7.59  4.50
11 11_HA_11_CA_11_CB_11_1HB   5.70  7.15  6.93
11 11_HA_11_CA_11_CB_11_2HB   6.70  5.21  5.50
13 13_HA_13_CA_13_CB_13_HB    7.70  3.09  4.61
15 15_HA_15_CA_15_CB_15_1HB   8.40  7.32 10.18
15 15_HA_15_CA_15_CB_15_2HB   1.40  5.41  3.68
16 16_HA_16_CA_16_CB_16_1HB   5.50  6.46  6.36
16 16_HA_16_CA_16_CB_16_2HB   8.20  7.18  7.28
17 17_HA_17_CA_17_CB_17_HB    2.70  2.87  2.81
18 18_HA_18_CA_18_CB_18_1HB   9.30  6.86  8.83
18 18_HA_18_CA_18_CB_18_2HB   2.50  6.50  4.40
19 19_HA_19_CA_19_CB_19_1HB   6.80  7.07  8.00
19 19_HA_19_CA_19_CB_19_2HB   7.30  6.78  6.71
20 20_HA_20_CA_20_CB_20_1HB   9.40  6.69  5.51
20 20_HA_20_CA_20_CB_20_2HB   3.00  3.15  3.27
23 23_HA_23_CA_23_CB_23_HB    10.20  7.24  9.93
25 25_HA_25_CA_25_CB_25_1HB   8.40  3.39  4.71
25 25_HA_25_CA_25_CB_25_2HB   5.30 10.33  9.39
26 26_HA_26_CA_26_CB_26_HB    9.90 10.04 10.02
27 27_HA_27_CA_27_CB_27_1HB  10.60 10.68 10.64
27 27_HA_27_CA_27_CB_27_2HB   2.40  2.93  2.85
29 29_HA_29_CA_29_CB_29_1HB   9.20 10.24 10.34
29 29_HA_29_CA_29_CB_29_2HB   1.90  3.07  2.96
30 30_HA_30_CA_30_CB_30_HB    10.50  9.99 10.03
31 31_HA_31_CA_31_CB_31_1HB   3.80  3.29  3.22
31 31_HA_31_CA_31_CB_31_2HB  11.30 10.68 10.65
32 32_HA_32_CA_32_CB_32_1HB   7.40  3.36  4.42
32 32_HA_32_CA_32_CB_32_2HB   5.30 10.60  9.51
33 33_HA_33_CA_33_CB_33_1HB   9.00  8.61  8.54
33 33_HA_33_CA_33_CB_33_2HB   4.00  4.83  4.98
34 34_HA_34_CA_34_CB_34_1HB  10.20  9.69 10.02
34 34_HA_34_CA_34_CB_34_2HB   4.40  3.61  3.39
36 36_HA_36_CA_36_CB_36_HB    8.80  4.19  7.02
37 37_HA_37_CA_37_CB_37_1HB   6.50  5.65  6.81
37 37_HA_37_CA_37_CB_37_2HB   7.00  6.85  6.83
38 38_HA_38_CA_38_CB_38_1HB   7.80  9.11  7.68
38 38_HA_38_CA_38_CB_38_2HB   5.40  6.23  6.46
39 39_HA_39_CA_39_CB_39_1HB   4.70  3.60  4.01

```

|    |                          |       |       |       |
|----|--------------------------|-------|-------|-------|
| 39 | 39_HA_39_CA_39_CB_39_2HB | 4.40  | 10.33 | 6.08  |
| 40 | 40_HA_40_CA_40_CB_40_1HB | 12.20 | 9.50  | 9.17  |
| 40 | 40_HA_40_CA_40_CB_40_2HB | 2.00  | 4.26  | 4.70  |
| 42 | 42_HA_42_CA_42_CB_42_1HB | 8.30  | 5.57  | 4.55  |
| 42 | 42_HA_42_CA_42_CB_42_2HB | 4.30  | 7.82  | 8.95  |
| 43 | 43_HA_43_CA_43_CB_43_1HB | 9.90  | 7.97  | 10.35 |
| 43 | 43_HA_43_CA_43_CB_43_2HB | 1.50  | 5.47  | 2.93  |
| 44 | 44_HA_44_CA_44_CB_44_HB  | 8.00  | 7.81  | 9.89  |
| 45 | 45_HA_45_CA_45_CB_45_1HB | 3.50  | 3.46  | 3.34  |
| 45 | 45_HA_45_CA_45_CB_45_2HB | 9.80  | 10.68 | 10.75 |
| 50 | 50_HA_50_CA_50_CB_50_1HB | 11.40 | 10.23 | 10.73 |
| 50 | 50_HA_50_CA_50_CB_50_2HB | 3.90  | 3.87  | 3.71  |
| 51 | 51_HA_51_CA_51_CB_51_1HB | 9.20  | 9.31  | 6.61  |
| 51 | 51_HA_51_CA_51_CB_51_2HB | 3.20  | 4.41  | 7.22  |
| 52 | 52_HA_52_CA_52_CB_52_1HB | 10.00 | 7.05  | 10.14 |
| 52 | 52_HA_52_CA_52_CB_52_2HB | 1.30  | 5.60  | 4.69  |
| 54 | 54_HA_54_CA_54_CB_54_1HB | 11.30 | 9.93  | 10.28 |
| 54 | 54_HA_54_CA_54_CB_54_2HB | 1.40  | 3.69  | 3.44  |
| 55 | 55_HA_55_CA_55_CB_55_HB  | 2.40  | 2.06  | 2.17  |
| 56 | 56_HA_56_CA_56_CB_56_1HB | 9.90  | 8.38  | 10.41 |
| 56 | 56_HA_56_CA_56_CB_56_2HB | 2.10  | 4.85  | 2.90  |
| 58 | 58_HA_58_CA_58_CB_58_1HB | 11.40 | 3.26  | 6.26  |
| 58 | 58_HA_58_CA_58_CB_58_2HB | 2.40  | 10.41 | 7.90  |
| 59 | 59_HA_59_CA_59_CB_59_1HB | 10.00 | 10.34 | 10.52 |
| 59 | 59_HA_59_CA_59_CB_59_2HB | 1.80  | 2.81  | 2.93  |
| 60 | 60_HA_60_CA_60_CB_60_1HB | 6.70  | 3.08  | 7.34  |
| 60 | 60_HA_60_CA_60_CB_60_2HB | 5.50  | 10.44 | 6.62  |
| 61 | 61_HA_61_CA_61_CB_61_HB  | 9.80  | 9.73  | 10.08 |
| 62 | 62_HA_62_CA_62_CB_62_1HB | 11.10 | 9.80  | 9.48  |
| 62 | 62_HA_62_CA_62_CB_62_2HB | 3.10  | 3.69  | 3.55  |
| 63 | 63_HA_63_CA_63_CB_63_1HB | 3.50  | 4.33  | 4.38  |
| 63 | 63_HA_63_CA_63_CB_63_2HB | 4.40  | 4.91  | 4.50  |
| 64 | 64_HA_64_CA_64_CB_64_1HB | 9.90  | 10.33 | 10.39 |
| 64 | 64_HA_64_CA_64_CB_64_2HB | 1.50  | 3.43  | 3.37  |
| 65 | 65_HA_65_CA_65_CB_65_1HB | 8.90  | 7.53  | 8.16  |
| 65 | 65_HA_65_CA_65_CB_65_2HB | 4.20  | 2.84  | 2.87  |
| 66 | 66_HA_66_CA_66_CB_66_HB  | 10.60 | 9.10  | 9.03  |
| 68 | 68_HA_68_CA_68_CB_68_1HB | 10.10 | 8.00  | 8.45  |
| 68 | 68_HA_68_CA_68_CB_68_2HB | 2.00  | 5.28  | 4.69  |
| 69 | 69_HA_69_CA_69_CB_69_1HB | 4.70  | 3.83  | 3.96  |
| 69 | 69_HA_69_CA_69_CB_69_2HB | 9.50  | 10.56 | 10.43 |
| 70 | 70_HA_70_CA_70_CB_70_HB  | 7.30  | 4.65  | 3.23  |
| 72 | 72_HA_72_CA_72_CB_72_1HB | 6.40  | 3.95  | 3.71  |
| 72 | 72_HA_72_CA_72_CB_72_2HB | 6.60  | 8.44  | 9.04  |
| 73 | 73_HA_73_CA_73_CB_73_1HB | 8.60  | 6.91  | 10.08 |
| 73 | 73_HA_73_CA_73_CB_73_2HB | 4.50  | 6.61  | 3.89  |

#

#

# N/C'-CA-CB-CG couplings, for residues where CG is a methyl

# Column 1: Residue number

# Column 2: Residue-name and first & last atom for dihedral (e.g. ILE\_CCG2 means C'-CA-CG-CG2 in an Isoleucine)

# Column 3: Experimental scalar coupling

# Column 4: Calculated scalar coupling from ff99SB simulation

# Column 5: Calculated scalar coupling from ff99SB-ILDN simulation

#

|   |          |      |      |      |
|---|----------|------|------|------|
| 3 | ILE_CCG2 | 3.68 | 4.08 | 4.10 |
|---|----------|------|------|------|

|    |          |      |      |      |
|----|----------|------|------|------|
| 3  | ILE_NCG2 | 0.39 | 0.58 | 0.69 |
| 5  | VAL_CCG1 | 0.00 | 0.61 | 0.64 |
| 5  | VAL_CCG2 | 3.66 | 3.70 | 3.47 |
| 5  | VAL_NCG1 | 1.83 | 1.85 | 1.73 |
| 5  | VAL_NCG2 | 0.46 | 1.21 | 1.24 |
| 7  | THR_CCG2 | 2.67 | 3.25 | 3.29 |
| 7  | THR_NCG2 | 1.08 | 0.90 | 0.89 |
| 9  | THR_CCG2 | 3.00 | 3.39 | 3.40 |
| 9  | THR_NCG2 | 0.81 | 0.60 | 0.61 |
| 12 | THR_CCG2 | 0.39 | 0.35 | 0.35 |
| 12 | THR_NCG2 | 1.61 | 1.43 | 1.42 |
| 13 | ILE_CCG2 | 1.71 | 3.96 | 3.28 |
| 13 | ILE_NCG2 | 1.44 | 0.70 | 1.05 |
| 14 | THR_CCG2 | 0.76 | 0.82 | 0.55 |
| 14 | THR_NCG2 | 1.50 | 1.28 | 1.36 |
| 17 | VAL_CCG1 | 3.93 | 4.04 | 4.02 |
| 17 | VAL_CCG2 | 0.96 | 0.77 | 0.75 |
| 17 | VAL_NCG1 | 0.25 | 0.68 | 0.63 |
| 17 | VAL_NCG2 | 0.68 | 0.40 | 0.46 |
| 22 | THR_CCG2 | 3.39 | 2.99 | 3.46 |
| 22 | THR_NCG2 | 0.75 | 0.74 | 0.59 |
| 23 | ILE_CCG2 | 0.94 | 1.17 | 1.17 |
| 23 | ILE_NCG2 | 2.11 | 1.33 | 2.08 |
| 26 | VAL_CCG1 | 0.82 | 0.66 | 0.86 |
| 26 | VAL_CCG2 | 4.18 | 4.03 | 4.05 |
| 26 | VAL_NCG1 | 2.16 | 2.01 | 2.05 |
| 26 | VAL_NCG2 | 0.62 | 1.05 | 0.83 |
| 30 | ILE_CCG2 | 0.96 | 1.20 | 1.16 |
| 30 | ILE_NCG2 | 2.10 | 2.11 | 2.12 |
| 36 | ILE_CCG2 | 0.71 | 1.78 | 0.65 |
| 36 | ILE_NCG2 | 2.08 | 0.76 | 1.36 |
| 44 | ILE_CCG2 | 0.80 | 1.71 | 0.85 |
| 44 | ILE_NCG2 | 1.62 | 1.63 | 2.04 |
| 55 | THR_CCG2 | 3.02 | 3.36 | 3.39 |
| 55 | THR_NCG2 | 0.82 | 0.72 | 0.83 |
| 61 | ILE_CCG2 | 0.98 | 1.00 | 0.90 |
| 61 | ILE_NCG2 | 2.15 | 2.02 | 2.10 |
| 70 | VAL_CCG2 | 2.43 | 1.57 | 0.93 |
| 70 | VAL_NCG2 | 0.50 | 0.56 | 0.44 |

#

#

# C'-CA-CB-CG couplings, for all residues

# Column 1: Residue number

# Column 2: Four atoms that define the dihedral, each labelled by residue number and atom name

# Column 3: Experimental scalar coupling

# Column 4: Calculated scalar coupling from ff99SB simulation

# Column 5: Calculated scalar coupling from ff99SB-ILDN simulation

#

|   |                     |      |      |      |
|---|---------------------|------|------|------|
| 2 | 2_C_2_CA_2_CB_2_CG  | 2.40 | 1.79 | 2.18 |
| 3 | 3_C_3_CA_3_CB_3_CG1 | 1.00 | 0.50 | 0.54 |
| 3 | 3_C_3_CA_3_CB_3_CG2 | 3.80 | 3.45 | 3.48 |
| 4 | 4_C_4_CA_4_CB_4_CG  | 4.00 | 3.58 | 3.58 |
| 5 | 5_C_5_CA_5_CB_5_CG2 | 3.50 | 3.29 | 3.09 |
| 6 | 6_C_6_CA_6_CB_6_CG  | 2.00 | 2.08 | 2.32 |
| 7 | 7_C_7_CA_7_CB_7_CG2 | 2.50 | 3.24 | 3.27 |
| 8 | 8_C_8_CA_8_CB_8_CG  | 2.60 | 1.67 | 3.04 |



|    |                         |      |      |      |
|----|-------------------------|------|------|------|
| 9  | 9_C_9_CA_9_CB_9_CG2     | 2.80 | 3.08 | 3.10 |
| 13 | 13_C_13_CA_13_CB_13_CG1 | 2.30 | 0.59 | 1.20 |
| 13 | 13_C_13_CA_13_CB_13_CG2 | 1.50 | 3.35 | 2.80 |
| 14 | 14_C_14_CA_14_CB_14_CG2 | 0.70 | 0.79 | 0.55 |
| 15 | 15_C_15_CA_15_CB_15_CG  | 2.20 | 2.27 | 3.41 |
| 16 | 16_C_16_CA_16_CB_16_CG  | 1.80 | 1.93 | 1.89 |
| 17 | 17_C_17_CA_17_CB_17_CG1 | 3.60 | 3.47 | 3.45 |
| 17 | 17_C_17_CA_17_CB_17_CG2 | 0.90 | 0.54 | 0.54 |
| 19 | 19_C_19_CA_19_CB_19_CG  | 2.20 | 2.31 | 2.65 |
| 21 | 21_C_21_CA_21_CB_21_CG  | 5.50 | 1.30 | 3.91 |
| 22 | 22_C_22_CA_22_CB_22_CG2 | 3.10 | 2.78 | 3.18 |
| 24 | 24_C_24_CA_24_CB_24_CG  | 1.50 | 1.92 | 0.88 |
| 25 | 25_C_25_CA_25_CB_25_CG  | 3.40 | 1.54 | 2.07 |
| 26 | 26_C_26_CA_26_CB_26_CG1 | 0.80 | 0.67 | 0.79 |
| 26 | 26_C_26_CA_26_CB_26_CG2 | 4.00 | 3.53 | 3.50 |
| 29 | 29_C_29_CA_29_CB_29_CG  | 4.00 | 3.35 | 3.39 |
| 31 | 31_C_31_CA_31_CB_31_CG  | 0.60 | 0.72 | 0.70 |
| 32 | 32_C_32_CA_32_CB_32_CG  | 3.30 | 1.24 | 1.66 |
| 33 | 33_C_33_CA_33_CB_33_CG  | 2.80 | 2.74 | 2.72 |
| 34 | 34_C_34_CA_34_CB_34_CG  | 2.90 | 3.13 | 3.27 |
| 38 | 38_C_38_CA_38_CB_38_CG  | 2.70 | 3.04 | 2.53 |
| 39 | 39_C_39_CA_39_CB_39_CG  | 1.80 | 1.29 | 1.42 |
| 40 | 40_C_40_CA_40_CB_40_CG  | 3.40 | 3.14 | 3.03 |
| 41 | 41_C_41_CA_41_CB_41_CG  | 3.50 | 3.62 | 3.44 |
| 42 | 42_C_42_CA_42_CB_42_CG  | 2.40 | 1.53 | 1.17 |
| 43 | 43_C_43_CA_43_CB_43_CG  | 3.00 | 2.47 | 3.34 |
| 44 | 44_C_44_CA_44_CB_44_CG1 | 3.10 | 2.56 | 3.42 |
| 44 | 44_C_44_CA_44_CB_44_CG2 | 0.70 | 1.48 | 0.75 |
| 48 | 48_C_48_CA_48_CB_48_CG  | 2.50 | 2.82 | 2.69 |
| 49 | 49_C_49_CA_49_CB_49_CG  | 1.40 | 1.64 | 2.12 |
| 50 | 50_C_50_CA_50_CB_50_CG  | 2.40 | 3.43 | 3.65 |
| 51 | 51_C_51_CA_51_CB_51_CG  | 2.90 | 3.05 | 2.00 |
| 54 | 54_C_54_CA_54_CB_54_CG  | 3.50 | 3.30 | 3.45 |
| 55 | 55_C_55_CA_55_CB_55_CG2 | 2.80 | 3.18 | 3.27 |
| 56 | 56_C_56_CA_56_CB_56_CG  | 2.80 | 2.62 | 3.42 |
| 58 | 58_C_58_CA_58_CB_58_CG  | 5.60 | 1.21 | 2.40 |
| 59 | 59_C_59_CA_59_CB_59_CG  | 3.60 | 3.26 | 3.35 |
| 60 | 60_C_60_CA_60_CB_60_CG  | 2.00 | 1.49 | 3.14 |
| 61 | 61_C_61_CA_61_CB_61_CG1 | 3.30 | 3.35 | 3.50 |
| 61 | 61_C_61_CA_61_CB_61_CG2 | 0.80 | 0.86 | 0.77 |
| 63 | 63_C_63_CA_63_CB_63_CG  | 1.20 | 0.87 | 0.88 |
| 64 | 64_C_64_CA_64_CB_64_CG  | 3.40 | 3.41 | 3.43 |
| 66 | 66_C_66_CA_66_CB_66_CG2 | 0.50 | 0.38 | 0.38 |
| 67 | 67_C_67_CA_67_CB_67_CG  | 3.40 | 3.37 | 3.49 |
| 68 | 68_C_68_CA_68_CB_68_CG  | 0.80 | 2.95 | 3.12 |
| 69 | 69_C_69_CA_69_CB_69_CG  | 0.80 | 0.84 | 0.89 |
| 72 | 72_C_72_CA_72_CB_72_CG  | 1.60 | 0.93 | 0.92 |
| 73 | 73_C_73_CA_73_CB_73_CG  | 2.80 | 2.07 | 3.34 |
| 74 | 74_C_74_CA_74_CB_74_CG  | 2.20 | 2.62 | 2.54 |

```

#
# Scalar coupling data for BPTI
#
# HA-CA-CB-HB couplings
# Column 1: Residue number
# Column 2: Four atoms that define the dihedral, each labelled by residue
number and atom name
# Column 3: Experimental scalar coupling
# Column 4: Calculated scalar coupling from ff99SB simulation
# Column 5: Calculated scalar coupling from ff99SB-ILDN simulation
#
4  4_HA_4_CA_4_CB_4_2HB      4.50  3.69  3.90
4  4_HA_4_CA_4_CB_4_HB3      4.50  4.34  4.11
5  5_HA_5_CA_5_CB_5_HB3      3.00  2.79  2.71
5  5_HA_5_CA_5_CB_5_2HB     12.00 10.08 10.07
11 11_HA_11_CA_11_CB_11_HB    8.20  7.73  8.23
14 14_HA_14_CA_14_CB_14_HB3   3.00  2.16  2.26
14 14_HA_14_CA_14_CB_14_2HB  12.00  9.84  9.94
15 15_HA_15_CA_15_CB_15_HB3   3.50  4.13  4.18
15 15_HA_15_CA_15_CB_15_2HB  11.00  8.94  8.85
18 18_HA_18_CA_18_CB_18_HB   10.50  3.25  7.56
19 19_HA_19_CA_19_CB_19_HB   11.00  7.44  9.91
20 20_HA_20_CA_20_CB_20_HB3   2.50  2.71  2.77
20 20_HA_20_CA_20_CB_20_2HB  12.50 10.56 10.63
22 22_HA_22_CA_22_CB_22_HB3   3.50  2.61  2.61
22 22_HA_22_CA_22_CB_22_2HB   4.40  5.74  5.72
23 23_HA_23_CA_23_CB_23_HB3  12.50 10.82 10.83
23 23_HA_23_CA_23_CB_23_2HB   3.80  3.21  3.23
24 24_HA_24_CA_24_CB_24_HB3  12.00 10.80 10.80
24 24_HA_24_CA_24_CB_24_2HB   3.50  3.54  3.44
30 30_HA_30_CA_30_CB_30_2HB  12.00  9.87  9.82
30 30_HA_30_CA_30_CB_30_HB3   2.50  2.14  2.10
31 31_HA_31_CA_31_CB_31_HB3   3.50  3.41  3.28
31 31_HA_31_CA_31_CB_31_2HB  11.00  9.77 10.07
32 32_HA_32_CA_32_CB_32_HB    2.50  2.55  2.58
33 33_HA_33_CA_33_CB_33_HB3   3.00  2.61  2.62
33 33_HA_33_CA_33_CB_33_2HB   4.50  5.78  5.75
34 34_HA_34_CA_34_CB_34_HB   10.50  8.02  7.98
35 35_HA_35_CA_35_CB_35_HB3  11.50 10.42 10.41
35 35_HA_35_CA_35_CB_35_2HB   6.50  4.40  4.40
38 38_HA_38_CA_38_CB_38_2HB   6.50  3.96  4.04
38 38_HA_38_CA_38_CB_38_HB3   1.50  2.45  2.40
41 41_HA_41_CA_41_CB_41_HB3   2.50  3.15  3.17
41 41_HA_41_CA_41_CB_41_2HB  12.50 10.67 10.66
43 43_HA_43_CA_43_CB_43_2HB   3.00  2.76  2.71
43 43_HA_43_CA_43_CB_43_HB3  12.00 10.48 10.37
44 44_HA_44_CA_44_CB_44_2HB   4.00  3.39  3.28
44 44_HA_44_CA_44_CB_44_HB3  11.00 10.79 10.77
45 45_HA_45_CA_45_CB_45_HB3   4.00  3.93  3.92
45 45_HA_45_CA_45_CB_45_2HB  11.80 10.68 10.68
46 46_HA_46_CA_46_CB_46_HB3   4.00  4.46  4.63
46 46_HA_46_CA_46_CB_46_2HB   9.50  8.07  8.04
47 47_HA_47_CA_47_CB_47_2HB   3.00  3.36  3.54
47 47_HA_47_CA_47_CB_47_HB3   2.80  2.72  2.70
51 51_HA_51_CA_51_CB_51_HB3  11.50  9.94  9.93
51 51_HA_51_CA_51_CB_51_2HB   5.50  3.29  3.32
52 52_HA_52_CA_52_CB_52_2HB   3.00  6.15  6.42

```

|    |                          |       |      |      |
|----|--------------------------|-------|------|------|
| 52 | 52_HA_52_CA_52_CB_52_HB3 | 10.20 | 7.19 | 6.91 |
| 54 | 54_HA_54_CA_54_CB_54_HB  | 10.00 | 8.38 | 8.77 |
| 55 | 55_HA_55_CA_55_CB_55_2HB | 11.00 | 9.93 | 9.91 |
| 55 | 55_HA_55_CA_55_CB_55_HB3 | 1.50  | 2.28 | 2.33 |

```

#
# Scalar coupling data for HEWL
#
# HA-CA-CB-HB couplings
# Column 1: Residue number
# Column 2: Four atoms that define the dihedral, each labelled by residue
number and atom name
# Column 3: Experimental scalar coupling
# Column 4: Calculated scalar coupling from ff99SB simulation
# Column 5: Calculated scalar coupling from ff99SB-ILDN simulation
#
2  2_HA_2_CA_2_CB_2_HB          9.80  7.51  7.29
3  3_HA_3_CA_3_CB_3_1HB         7.70  8.52  9.90
3  3_HA_3_CA_3_CB_3_2HB         1.00  4.15  2.88
6  6_HA_6_CA_6_CB_6_1HB        12.60 10.09 10.07
6  6_HA_6_CA_6_CB_6_2HB         0.90  2.62  2.68
8  8_HA_8_CA_8_CB_8_1HB         1.20  3.35  3.35
12 12_HA_12_CA_12_CB_12_1HB     12.60 10.43 10.46
12 12_HA_12_CA_12_CB_12_2HB     1.00  2.70  2.73
15 15_HA_15_CA_15_CB_15_1HB     9.00 10.46 10.51
15 15_HA_15_CA_15_CB_15_2HB     0.60  3.05  2.99
17 17_HA_17_CA_17_CB_17_1HB     9.50  5.23  5.77
17 17_HA_17_CA_17_CB_17_2HB     1.00  7.98  7.55
18 18_HA_18_CA_18_CB_18_1HB     1.70  3.62  3.21
18 18_HA_18_CA_18_CB_18_2HB    13.20 10.33  9.72
20 20_HA_20_CA_20_CB_20_1HB     1.40  3.39  3.47
20 20_HA_20_CA_20_CB_20_2HB    12.00 10.76 10.76
23 23_HA_23_CA_23_CB_23_1HB     8.30 10.06  8.33
23 23_HA_23_CA_23_CB_23_2HB     0.20  3.82  5.43
24 24_HA_24_CA_24_CB_24_1HB     1.00  5.21  5.98
27 27_HA_27_CA_27_CB_27_1HB    12.10  4.02 10.82
27 27_HA_27_CA_27_CB_27_2HB     0.50  8.62  3.18
30 30_HA_30_CA_30_CB_30_1HB     0.20  2.44  2.97
30 30_HA_30_CA_30_CB_30_2HB     6.80 10.06 10.07
33 33_HA_33_CA_33_CB_33_1HB     2.10  3.49  3.50
33 33_HA_33_CA_33_CB_33_2HB     7.90 10.73 10.70
34 34_HA_34_CA_34_CB_34_1HB    12.10 10.74  9.12
34 34_HA_34_CA_34_CB_34_2HB     1.60  3.10  4.88
38 38_HA_38_CA_38_CB_38_1HB    11.90 10.58 10.55
39 39_HA_39_CA_39_CB_39_1HB     2.20  3.40  4.23
39 39_HA_39_CA_39_CB_39_2HB    12.70 10.78  9.76
41 41_HA_41_CA_41_CB_41_1HB    10.00  9.06  8.51
41 41_HA_41_CA_41_CB_41_2HB     1.20  4.40  4.30
43 43_HA_43_CA_43_CB_43_HB      3.90  2.56  2.98
47 47_HA_47_CA_47_CB_47_HB      2.40  2.87  3.13
48 48_HA_48_CA_48_CB_48_1HB     0.20  4.72  3.49
48 48_HA_48_CA_48_CB_48_2HB     1.20  5.43  4.09
51 51_HA_51_CA_51_CB_51_HB     13.30  8.99  9.17
52 52_HA_52_CA_52_CB_52_1HB    10.30 10.52 10.08
52 52_HA_52_CA_52_CB_52_2HB     0.30  4.11  4.86
53 53_HA_53_CA_53_CB_53_1HB    12.50 10.66 10.74
53 53_HA_53_CA_53_CB_53_2HB     0.80  2.85  2.96
55 55_HA_55_CA_55_CB_55_HB      3.60  2.33  2.40
59 59_HA_59_CA_59_CB_59_1HB     1.90  3.36  3.61
59 59_HA_59_CA_59_CB_59_2HB     8.10 10.79 10.79
64 64_HA_64_CA_64_CB_64_1HB     0.90  3.55  3.63
64 64_HA_64_CA_64_CB_64_2HB     0.50  2.68  2.62

```

|     |                                                                                              |       |       |       |
|-----|----------------------------------------------------------------------------------------------|-------|-------|-------|
| 65  | 65_HA_65_CA_65_CB_65_1HB                                                                     | 2.10  | 3.73  | 3.87  |
| 65  | 65_HA_65_CA_65_CB_65_2HB                                                                     | 13.40 | 10.68 | 10.57 |
| 66  | 66_HA_66_CA_66_CB_66_1HB                                                                     | 0.10  | 4.40  | 3.64  |
| 66  | 66_HA_66_CA_66_CB_66_2HB                                                                     | 2.20  | 3.75  | 3.99  |
| 69  | 69_HA_69_CA_69_CB_69_HB                                                                      | 11.40 | 9.06  | 8.85  |
| 74  | 74_HA_74_CA_74_CB_74_1HB                                                                     | 1.70  | 3.30  | 3.22  |
| 74  | 74_HA_74_CA_74_CB_74_2HB                                                                     | 12.60 | 10.78 | 10.76 |
| 80  | 80_HA_80_CA_80_CB_80_1HB                                                                     | 13.80 | 10.10 | 10.10 |
| 80  | 80_HA_80_CA_80_CB_80_2HB                                                                     | 1.00  | 2.73  | 2.73  |
| 84  | 84_HA_84_CA_84_CB_84_1HB                                                                     | 12.00 | 6.57  | 8.83  |
| 84  | 84_HA_84_CA_84_CB_84_2HB                                                                     | 0.50  | 6.69  | 4.98  |
| 87  | 87_HA_87_CA_87_CB_87_2HB                                                                     | 12.20 | 10.66 | 10.36 |
| 88  | 88_HA_88_CA_88_CB_88_HB                                                                      | 2.00  | 3.17  | 3.27  |
| 89  | 89_HA_89_CA_89_CB_89_HB                                                                      | 10.80 | 8.30  | 8.89  |
| 93  | 93_HA_93_CA_93_CB_93_1HB                                                                     | 13.50 | 4.05  | 8.30  |
| 93  | 93_HA_93_CA_93_CB_93_2HB                                                                     | 1.90  | 9.83  | 5.42  |
| 94  | 94_HA_94_CA_94_CB_94_1HB                                                                     | 2.10  | 2.64  | 2.70  |
| 94  | 94_HA_94_CA_94_CB_94_2HB                                                                     | 15.00 | 10.12 | 9.96  |
| 98  | 98_HA_98_CA_98_CB_98_HB                                                                      | 15.30 | 6.63  | 9.90  |
| 105 | 105_HA_105_CA_105_CB_105_1HB                                                                 | 13.00 | 9.49  | 8.11  |
| 105 | 105_HA_105_CA_105_CB_105_2HB                                                                 | 2.60  | 4.34  | 5.60  |
| 106 | 106_HA_106_CA_106_CB_106_1HB                                                                 | 13.20 | 3.19  | 6.81  |
| 106 | 106_HA_106_CA_106_CB_106_2HB                                                                 | 3.10  | 10.43 | 7.01  |
| 111 | 111_HA_111_CA_111_CB_111_1HB                                                                 | 1.70  | 3.44  | 3.98  |
| 114 | 114_HA_114_CA_114_CB_114_2HB                                                                 | 1.80  | 3.65  | 6.09  |
| 116 | 116_HA_116_CA_116_CB_116_1HB                                                                 | 3.40  | 3.52  | 3.64  |
| 116 | 116_HA_116_CA_116_CB_116_2HB                                                                 | 9.80  | 10.34 | 10.33 |
| 118 | 118_HA_118_CA_118_CB_118_HB                                                                  | 4.90  | 2.44  | 2.67  |
| 119 | 119_HA_119_CA_119_CB_119_1HB                                                                 | 4.50  | 3.56  | 3.46  |
| 119 | 119_HA_119_CA_119_CB_119_2HB                                                                 | 13.30 | 10.77 | 10.78 |
| 120 | 120_HA_120_CA_120_CB_120_HB                                                                  | 4.50  | 2.62  | 2.69  |
| 123 | 123_HA_123_CA_123_CB_123_1HB                                                                 | 8.60  | 10.69 | 10.60 |
| 123 | 123_HA_123_CA_123_CB_123_2HB                                                                 | 0.30  | 3.71  | 3.99  |
| 124 | 124_HA_124_CA_124_CB_124_HB                                                                  | 4.20  | 3.19  | 7.66  |
| 127 | 127_HA_127_CA_127_CB_127_2HB                                                                 | 2.60  | 2.78  | 2.85  |
| #   |                                                                                              |       |       |       |
| #   |                                                                                              |       |       |       |
| #   | C'-CA-CB-HB couplings                                                                        |       |       |       |
| #   | Column 1: Residue number                                                                     |       |       |       |
| #   | Column 2: Four atoms that define the dihedral, each labelled by residue number and atom name |       |       |       |
| #   | Column 3: Experimental scalar coupling                                                       |       |       |       |
| #   | Column 4: Calculated scalar coupling from ff99SB simulation                                  |       |       |       |
| #   | Column 5: Calculated scalar coupling from ff99SB-ILDN simulation                             |       |       |       |
| #   |                                                                                              |       |       |       |
| 2   | 2_C_2_CA_2_CB_2_HB                                                                           | 2.60  | 1.48  | 1.65  |
| 3   | 3_C_3_CA_3_CB_3_1HB                                                                          | 1.40  | 1.70  | 1.23  |
| 3   | 3_C_3_CA_3_CB_3_2HB                                                                          | 3.60  | 1.98  | 1.99  |
| 6   | 6_C_6_CA_6_CB_6_1HB                                                                          | 3.70  | 1.07  | 1.08  |
| 6   | 6_C_6_CA_6_CB_6_2HB                                                                          | 2.60  | 1.33  | 1.31  |
| 8   | 8_C_8_CA_8_CB_8_1HB                                                                          | 8.50  | 4.11  | 4.09  |
| 8   | 8_C_8_CA_8_CB_8_2HB                                                                          | 3.10  | 1.34  | 1.35  |
| 12  | 12_C_12_CA_12_CB_12_1HB                                                                      | 1.80  | 1.13  | 1.13  |
| 12  | 12_C_12_CA_12_CB_12_2HB                                                                      | 2.20  | 1.84  | 1.83  |
| 15  | 15_C_15_CA_15_CB_15_1HB                                                                      | 2.20  | 1.21  | 1.18  |
| 17  | 17_C_17_CA_17_CB_17_1HB                                                                      | 1.80  | 3.07  | 2.90  |
| 17  | 17_C_17_CA_17_CB_17_2HB                                                                      | 2.20  | 1.68  | 1.67  |

|     |                             |       |      |      |
|-----|-----------------------------|-------|------|------|
| 18  | 18_C_18_CA_18_CB_18_1HB     | 8.30  | 3.95 | 3.68 |
| 20  | 20_C_20_CA_20_CB_20_1HB     | 8.10  | 4.11 | 4.11 |
| 20  | 20_C_20_CA_20_CB_20_2HB     | 4.40  | 1.34 | 1.32 |
| 23  | 23_C_23_CA_23_CB_23_1HB     | 3.00  | 1.51 | 2.10 |
| 23  | 23_C_23_CA_23_CB_23_2HB     | 2.60  | 1.58 | 1.58 |
| 24  | 24_C_24_CA_24_CB_24_1HB     | 1.30  | 1.10 | 1.22 |
| 24  | 24_C_24_CA_24_CB_24_2HB     | 7.40  | 2.84 | 2.39 |
| 27  | 27_C_27_CA_27_CB_27_1HB     | 0.30  | 3.34 | 1.24 |
| 27  | 27_C_27_CA_27_CB_27_2HB     | 1.10  | 1.84 | 1.56 |
| 30  | 30_C_30_CA_30_CB_30_1HB     | 7.70  | 3.88 | 3.89 |
| 30  | 30_C_30_CA_30_CB_30_2HB     | 2.30  | 1.18 | 1.04 |
| 33  | 33_C_33_CA_33_CB_33_1HB     | 1.10  | 4.10 | 4.09 |
| 33  | 33_C_33_CA_33_CB_33_2HB     | 12.50 | 1.30 | 1.31 |
| 34  | 34_C_34_CA_34_CB_34_1HB     | 1.10  | 1.18 | 1.87 |
| 34  | 34_C_34_CA_34_CB_34_2HB     | 2.20  | 1.72 | 1.59 |
| 38  | 38_C_38_CA_38_CB_38_1HB     | 0.70  | 1.41 | 1.41 |
| 38  | 38_C_38_CA_38_CB_38_2HB     | 3.00  | 1.43 | 1.45 |
| 39  | 39_C_39_CA_39_CB_39_1HB     | 8.10  | 4.11 | 3.73 |
| 39  | 39_C_39_CA_39_CB_39_2HB     | 2.20  | 1.34 | 1.42 |
| 40  | 40_C_40_CA_40_CB_40_HB      | 0.40  | 1.09 | 1.07 |
| 41  | 41_C_41_CA_41_CB_41_1HB     | 1.90  | 1.70 | 1.65 |
| 43  | 43_C_43_CA_43_CB_43_HB      | 1.80  | 1.69 | 1.36 |
| 47  | 47_C_47_CA_47_CB_47_HB      | 1.70  | 1.22 | 1.20 |
| 48  | 48_C_48_CA_48_CB_48_1HB     | 0.70  | 2.13 | 1.50 |
| 48  | 48_C_48_CA_48_CB_48_2HB     | 9.60  | 3.12 | 4.05 |
| 51  | 51_C_51_CA_51_CB_51_HB      | 1.70  | 0.83 | 0.80 |
| 52  | 52_C_52_CA_52_CB_52_2HB     | 1.10  | 1.31 | 1.20 |
| 53  | 53_C_53_CA_53_CB_53_1HB     | 2.60  | 1.17 | 1.21 |
| 53  | 53_C_53_CA_53_CB_53_2HB     | 1.90  | 1.77 | 1.69 |
| 55  | 55_C_55_CA_55_CB_55_HB      | 7.00  | 3.90 | 3.88 |
| 59  | 59_C_59_CA_59_CB_59_1HB     | 8.50  | 4.12 | 4.10 |
| 64  | 64_C_64_CA_64_CB_64_1HB     | 2.10  | 1.05 | 1.03 |
| 64  | 64_C_64_CA_64_CB_64_2HB     | 8.00  | 3.91 | 3.91 |
| 65  | 65_C_65_CA_65_CB_65_1HB     | 8.10  | 4.07 | 4.03 |
| 65  | 65_C_65_CA_65_CB_65_2HB     | 1.00  | 1.29 | 1.29 |
| 66  | 66_C_66_CA_66_CB_66_1HB     | 1.40  | 1.48 | 1.49 |
| 66  | 66_C_66_CA_66_CB_66_2HB     | 10.90 | 3.93 | 4.05 |
| 74  | 74_C_74_CA_74_CB_74_1HB     | 6.60  | 4.12 | 4.10 |
| 74  | 74_C_74_CA_74_CB_74_2HB     | 0.10  | 1.37 | 1.41 |
| 80  | 80_C_80_CA_80_CB_80_1HB     | 2.80  | 1.09 | 1.09 |
| 80  | 80_C_80_CA_80_CB_80_2HB     | 0.90  | 1.29 | 1.29 |
| 84  | 84_C_84_CA_84_CB_84_1HB     | 2.60  | 2.55 | 1.89 |
| 84  | 84_C_84_CA_84_CB_84_2HB     | 1.50  | 1.70 | 1.61 |
| 89  | 89_C_89_CA_89_CB_89_HB      | 3.30  | 0.90 | 0.82 |
| 92  | 92_C_92_CA_92_CB_92_HB      | 1.30  | 1.14 | 1.11 |
| 94  | 94_C_94_CA_94_CB_94_1HB     | 9.80  | 3.90 | 3.83 |
| 94  | 94_C_94_CA_94_CB_94_2HB     | 3.10  | 1.10 | 1.13 |
| 98  | 98_C_98_CA_98_CB_98_HB      | 1.80  | 1.11 | 1.00 |
| 105 | 105_C_105_CA_105_CB_105_1HB | 1.10  | 1.64 | 2.14 |
| 105 | 105_C_105_CA_105_CB_105_2HB | 1.40  | 1.63 | 1.62 |
| 106 | 106_C_106_CA_106_CB_106_1HB | 3.00  | 4.00 | 2.68 |
| 106 | 106_C_106_CA_106_CB_106_2HB | 3.00  | 1.49 | 1.55 |
| 116 | 116_C_116_CA_116_CB_116_1HB | 8.50  | 3.94 | 3.94 |
| 116 | 116_C_116_CA_116_CB_116_2HB | 2.20  | 1.46 | 1.46 |
| 118 | 118_C_118_CA_118_CB_118_HB  | 1.80  | 1.18 | 1.09 |
| 120 | 120_C_120_CA_120_CB_120_HB  | 3.00  | 1.44 | 1.41 |
| 123 | 123_C_123_CA_123_CB_123_1HB | 1.10  | 1.36 | 1.44 |

|     |                             |      |      |      |
|-----|-----------------------------|------|------|------|
| 123 | 123_C_123_CA_123_CB_123_2HB | 1.80 | 1.46 | 1.38 |
| 124 | 124_C_124_CA_124_CB_124_HB  | 0.80 | 1.38 | 1.26 |
| 127 | 127_C_127_CA_127_CB_127_2HB | 0.80 | 1.58 | 1.75 |

```

#
# Rotamer distributions in the PDB and MD simulations.
#
# m, p, and t refer to the 'minus', 'plus' and 'trans' rotamers
# as defined by Lovell et al.
# The values listed under PDB are the rotamets for residues in
# helices as taken from Lovell et al
# The values listed under ff99SB and ff99SB-ILDN, respectively,
# are the rotamer distributions observed in simulations of
# poly-alanine based helices as described in the manuscript
#

```

|     | PDB  |      |      | ff99SB |      |      | ff99SB-ILDN |      |      |
|-----|------|------|------|--------|------|------|-------------|------|------|
|     | m    | p    | t    | m      | p    | t    | m           | p    | t    |
| ARG | 0.54 | 0.04 | 0.43 | 0.56   | 0.01 | 0.43 | -           | -    | -    |
| ASN | 0.80 | 0.01 | 0.19 | 0.04   | 0.00 | 0.96 | 0.27        | 0.00 | 0.73 |
| ASP | 0.79 | 0.02 | 0.19 | 0.00   | 0.00 | 1.00 | 0.09        | 0.00 | 0.91 |
| CYS | 0.75 | 0.05 | 0.20 | 0.73   | 0.04 | 0.23 | -           | -    | -    |
| GLN | 0.61 | 0.04 | 0.35 | 0.57   | 0.01 | 0.42 | -           | -    | -    |
| GLU | 0.61 | 0.01 | 0.38 | 0.24   | 0.02 | 0.74 | -           | -    | -    |
| HIS | 0.52 | 0.00 | 0.48 | 0.14   | 0.00 | 0.86 | -           | -    | -    |
| ILE | 0.92 | 0.05 | 0.03 | 0.33   | 0.44 | 0.23 | 0.85        | 0.12 | 0.03 |
| LEU | 0.66 | 0.01 | 0.33 | 0.13   | 0.00 | 0.87 | 0.61        | 0.00 | 0.39 |
| LYS | 0.54 | 0.00 | 0.46 | 0.46   | 0.01 | 0.52 | -           | -    | -    |
| MET | 0.72 | 0.02 | 0.26 | 0.42   | 0.02 | 0.56 | -           | -    | -    |
| PHE | 0.41 | 0.01 | 0.58 | 0.18   | 0.00 | 0.82 | -           | -    | -    |
| SER | 0.44 | 0.33 | 0.22 | 0.79   | 0.16 | 0.06 | -           | -    | -    |
| THR | 0.75 | 0.25 | 0.00 | 0.75   | 0.25 | 0.00 | -           | -    | -    |
| TRP | 0.39 | 0.03 | 0.58 | 0.29   | 0.02 | 0.70 | -           | -    | -    |
| TYR | 0.42 | 0.01 | 0.57 | 0.15   | 0.00 | 0.85 | -           | -    | -    |
| VAL | 0.07 | 0.02 | 0.91 | 0.30   | 0.07 | 0.63 | -           | -    | -    |
